# Supplementary material for: Effect of Protection Polymer Coatings on the Performance of an Amperometric Galactose Biosensor in Human Plasma
Source: MDPI journal article supplement (doi:10.3390/bios14040167), 2024-03-30
Supplement: s1 [file s1]

# Effect of Protection Polymer Coatings on the Performance of an Amperometric Galactose Biosensor in Human Plasma

Carina Figueiredo <sup>1</sup>, Carolin Psotta <sup>2,3</sup>, Kavita Jayakumar <sup>4</sup>, Anna Lielpetere <sup>5</sup>, Tanushree Mandal <sup>4</sup>, Wolfgang Schuhmann <sup>5</sup>, Dónal Leech <sup>4</sup>, Magnus Falk <sup>2</sup>, Marcos Pita <sup>1</sup>, Sergey Shleev <sup>2,3</sup> and Antonio L. De Lacey <sup>1,\*</sup>

<sup>1</sup> Instituto de Catálisis y Petroleoquímica, CSIC, c/Marie Curie 2, 28049 Madrid, Spain; carina.felix@estudiante.uam.es (C.F.)

<sup>2</sup> Department of Biomedical Science, Faculty of Health and Society, & Biofilms-Research Center for Biointerfaces, Malmö University, 205 06 Malmö, Sweden; sergey.shleev@mau.se (S.S.)

<sup>3</sup> Aptusens AB, 293 94 Kyrkhult, Sweden

<sup>4</sup> School of Biological and Chemical Sciences & Ryan Institute, University of Galway, H91 TK33 Galway, Ireland; tanushreemandal2014@gmail.com (T.M.)

<sup>5</sup> Analytical Chemistry-Center for Electrochemical Science (CES), Faculty of Chemistry and Biochemistry, Ruhr-University Bochum, 44791 Bochum, Germany; anna.lielpetere@ruhr-uni-bochum.de (A.L.); wolfgang.schuhmann@rub.de (W.S.)

\* Correspondence: alopez@icp.csic.es; Tel.: +34-915854807

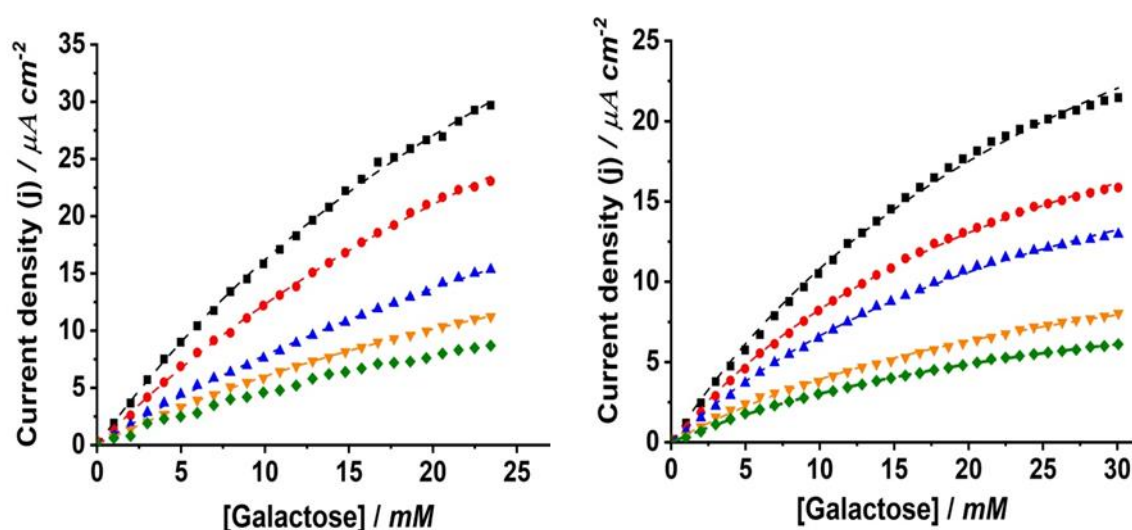

**Figure S1.** Current density dependence on galactose concentrations for uncoated (left graph) and coated GaOx-modified electrodes (right graph) measured by chronoamperometry measurements at +0.35 V vs. Ag/AgCl (3 M KCl) in 0.1 M phosphate buffer pH 7.0 after 1 (black), 2 (red), 3 (blue), 4 (orange) and 7 days (green) stored overnight in human plasma at 4°C.
